# Supplementary material
Source: PubMed Central journal article supplement (PMC2151680)
Supplement: plntphys_pp.107.107805_1.pdf [file plntphys_pp.107.107805_1.pdf]

## Supplementary figures and tables

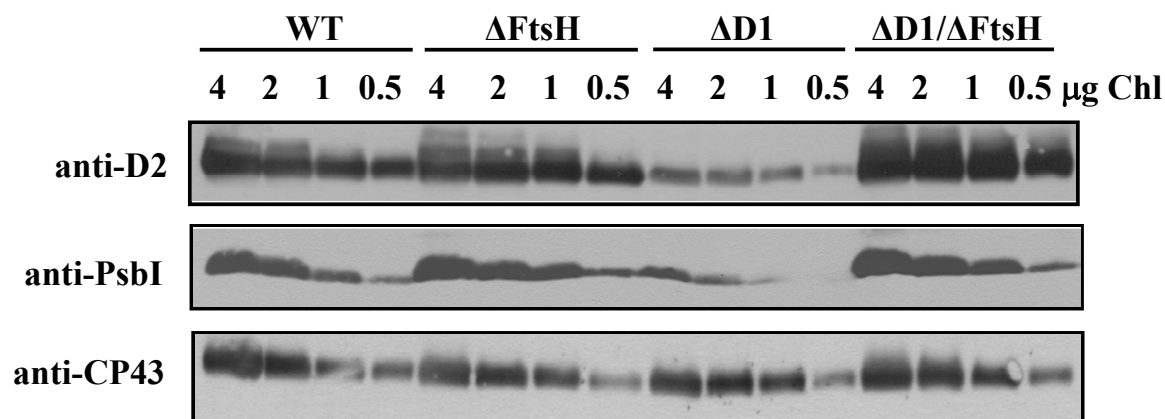

**Figure S1: Level of the unassembled PsbI protein is controlled by the protease FtsH (slr0228).** Thylakoid proteins from cells of wild-type (WT), mutant lacking FtsH (slr0228) protease ( $\Delta$ FtsH), D1-less mutant ( $\Delta$ D1) and the double mutant lacking both D1 and FtsH ( $\Delta$ D1/ $\Delta$ FtsH) were separated by denaturing SDS-PAGE and electroblotted onto PVDF membrane. Proteins were detected using antibodies specific for D2, PsbI and CP43 proteins from *Synechocystis* sp. PCC 6803. Correct protein loading was proven by blotting using antibody against CP43. Level of CP43 is not affected by FtsH (slr0228) (Komenda et al. 2006) and can be used as an internal standard for protein loading. 4, 2, 1 and 0.5  $\mu$ g of chlorophyll were loaded onto the gel.

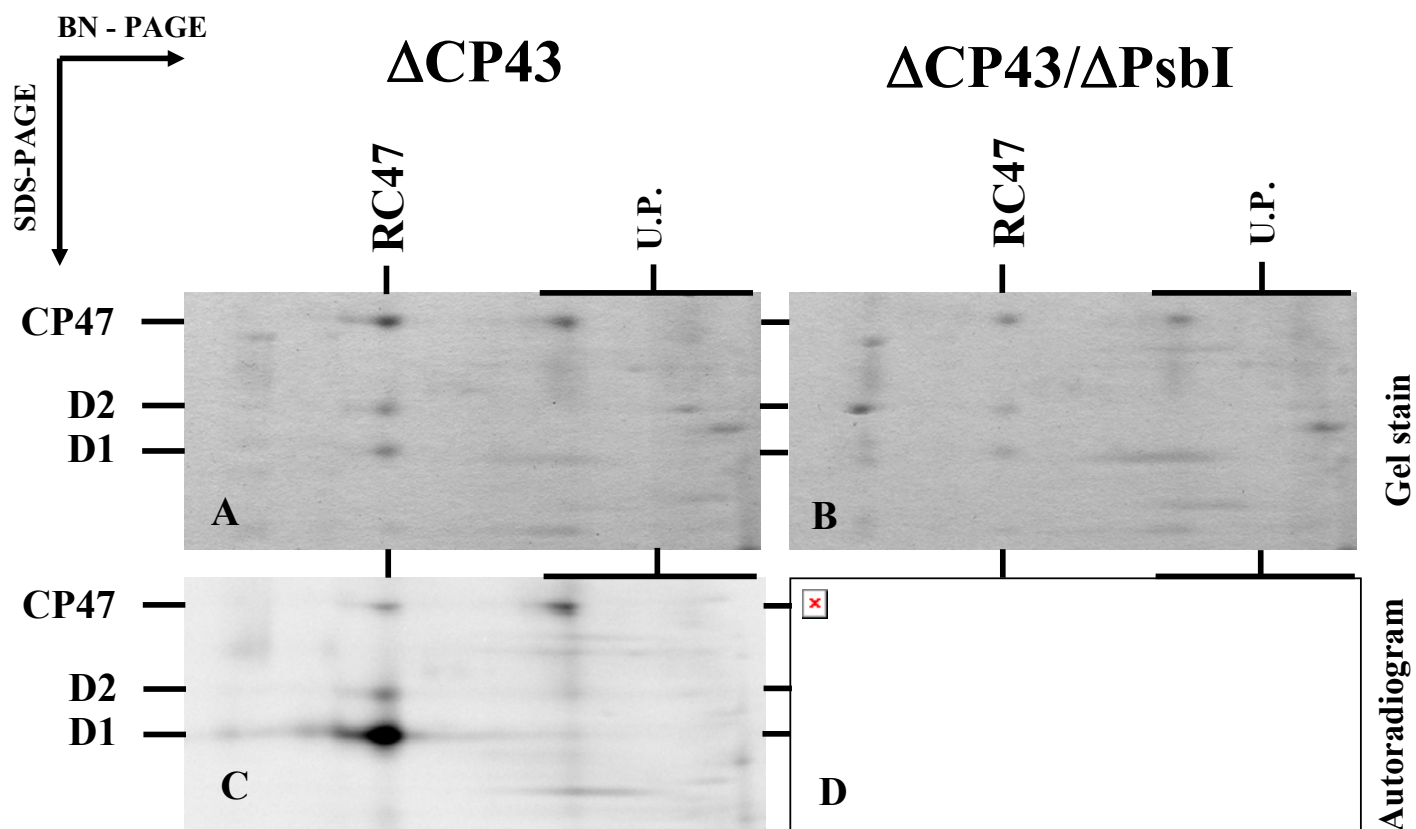

**Figure S2: PsbI does not affect assembly of the PSII RC47 complex in the CP43-less strain.** Thylakoid proteins from cells of *psbC* deletion mutant  $\Delta\text{CP43}$  and *psbC/psbI* double mutant  $\Delta\text{CP43}/\Delta\text{PsbI}$  were separated by 2D-BN/SDS-PAGE, stained by Coomassie Blue (Gel stain) and radioactive proteins visualized by autoradiography (autoradiogram).

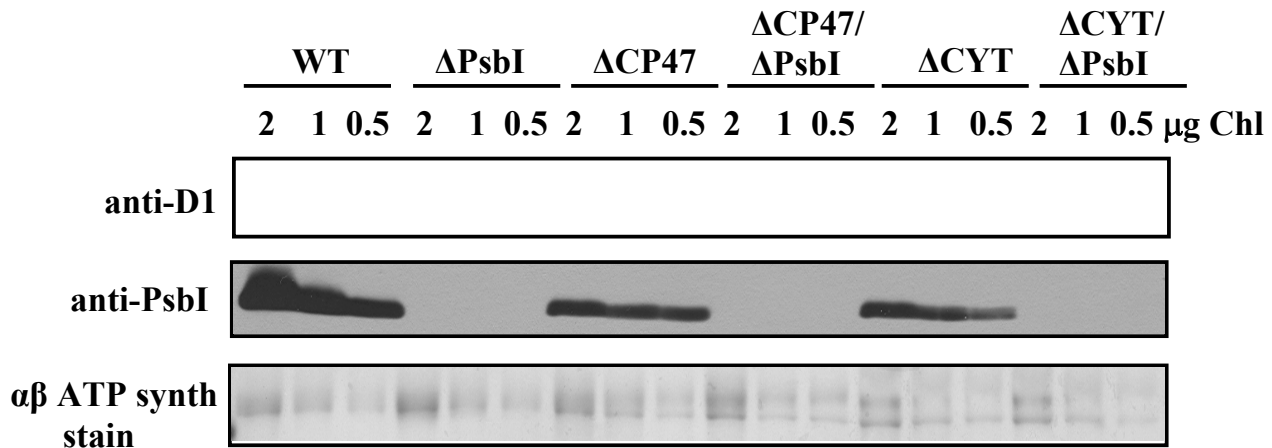

**Figure S3: Effect of PsbI absence on levels of the D1 protein in the wild-type, *psbB* ( $\Delta$ CP47) and *psbEFLJ* ( $\Delta$ CYT) deletion mutants.** Thylakoid proteins from designated strains were separated by denaturing SDS-PAGE, electroblotted onto PVDF membrane and immunodecorated using antibodies specific for D1 (anti-D1) and PsbI (anti-PsbI). Correct protein loading was checked by Ponceau staining and documented by the staining intensity of the  $\alpha$  and  $\beta$  subunits of ATP synthase ( $\alpha\beta$  ATPsynth stain). 2, 1 and 0.5  $\mu$ g of chlorophyll was loaded onto the gel for each strain.

Table S1. Characteristics of the wild-type strain WT and the mutant  $\Delta$ PsbI

|                                | <b>Doubling time<sup>a</sup></b><br>(h) | <b>O<sub>2</sub> evolution<sup>b</sup></b><br>( $\mu\text{mol O}_2 \text{ mg Chl}^{-1} \text{ h}^{-1}$ ) | <b>O<sub>2</sub> evolution<sup>c</sup></b><br><b>(BQ + K<sub>3</sub>Fe(CN)<sub>6</sub>)</b><br>( $\mu\text{mol O}_2 \text{ mg Chl}^{-1} \text{ h}^{-1}$ ) | <b>Fv/Fm<sup>d</sup></b><br>(PAM) |
|--------------------------------|-----------------------------------------|----------------------------------------------------------------------------------------------------------|-----------------------------------------------------------------------------------------------------------------------------------------------------------|-----------------------------------|
| <b>WT</b>                      | 15,2 ± 0,1                              | 372 ± 27<br>100%                                                                                         | 562 ± 32<br>100%                                                                                                                                          | 0,47±0.02<br>100%                 |
| <b><math>\Delta</math>PsbI</b> | 16,4 ± 0,1                              | 258 ± 13<br>69%                                                                                          | 343 ± 30<br>61%                                                                                                                                           | 0,32±0.02<br>68%                  |

<sup>a</sup>measured in microtitration plates at an irradiance of 25  $\mu\text{mol photons m}^{-2} \text{ s}^{-1}$ ; average of 11 measurements  $\pm$  SD.

<sup>b</sup>light-saturated rate of oxygen evolution measured in the absence of artificial electron acceptors; average of 6 measurements  $\pm$  SD.

<sup>c</sup>light-saturated rate of oxygen evolution measured in the presence of 1 mM p-benzoquinone and 5 mM potassium ferricyanide; average of 10 measurements  $\pm$  SD.

<sup>d</sup>values obtained by PAM modulated fluorimeter in the presence of  $10^{-5}$  M DCMU; average of 3 measurements  $\pm$  SD.

**Table S2. Distribution of the stained and labeled D1 protein among PSII complexes after pulse and pulse-chase labeling of WT and the  $\Delta$ PsbI mutant**

|                                                                | RCC(2)          | RCC-RC47        | RC47(2)        | RCC(1)           | RC47             | RCa             | U.P.             |
|----------------------------------------------------------------|-----------------|-----------------|----------------|------------------|------------------|-----------------|------------------|
| <b>WT pulse stain<sup>a</sup></b>                              | 6250<br>(41%)   | n.d.            | n.d.           | 8552<br>(54%)    | 773<br>(5%)      | n.d.            | n.d.             |
| <b>WT pulse autorad<sup>b</sup></b>                            | 46197<br>(2%)   | n.d.            | n.d.           | 294830<br>(15%)  | 158952<br>(8%)   | 410564<br>(20%) | 1154399<br>(55%) |
| <b>WT pulse-chase autorad<sup>b</sup></b>                      | 322479<br>(20%) | n.d.            | n.d.           | 1033171<br>(65%) | 154853<br>(10%)  | n.d.            | 82759<br>(5%)    |
| <b><math>\Delta</math>PsbI stain<sup>a</sup></b>               | 2355<br>(20%)   | 2490<br>(19%)   | 680<br>(6%)    | 3591<br>(30%)    | 3050<br>(25%)    | n.d.            | n.d.             |
| <b><math>\Delta</math>PsbI pulse autorad<sup>b</sup></b>       | 208971<br>(8%)  | 214816<br>(8%)  | 94332<br>(4%)  | 508849<br>(19%)  | 1637857<br>(61%) | n.d.            | n.d.             |
| <b><math>\Delta</math>PsbI pulse-chase autorad<sup>b</sup></b> | 312289<br>(19%) | 318470<br>(19%) | 142945<br>(8%) | 452931<br>(27%)  | 461994<br>(27%)  | n.d.            | n.d.             |

<sup>a</sup>quantification of stained D1 bands by ImageQuant software in 2D gels stained with Coomassie Blue, average of three measurements, SD did not exceed 6%. Identical amount of Chl (6  $\mu$ g) was loaded for each sample; samples of each strain after pulse and after pulse-chase were run on a single 2D gel, staining pattern of both samples were identical and only quantification of the samples after pulse is shown. Values indicate arbitrary counts, values in parenthesis show percentage of the overall D1 level in the sample. Designation of complexes as in Fig. 2, n.d. means not detected.

<sup>b</sup>quantification of labeled D1 bands by ImageQuant software from 2D autoradiogram obtained by exposure to Phosphoimager plate, average of three measurements, SD did not exceed 5%. Identical amount of Chl (6  $\mu$ g) was loaded for each sample; samples from particular strain after pulse and after pulse-chase were run on a single 2D gel and were directly compared. Values indicate arbitrary counts, values in parenthesis show percentage of the overall level of labeled D1 in the sample. Designation of complexes as in Fig. 2, n.d. means not detected.
